# Supplementary material for: Race, Ethnicity, and Pharmacogenomic Variation in the United States and the United Kingdom
Source: MDPI journal article supplement (doi:10.3390/pharmaceutics15071923), 2023-07-11
Supplement: s1 [file s1]

## Race, Ethnicity, and Pharmacogenomic Variation in the United States and the United Kingdom

Shivam Sharma <sup>1,2</sup>, Leonardo Mariño-Ramírez <sup>2</sup> and I. King Jordan <sup>1,\*</sup>

<sup>1</sup> School of Biological Sciences, Georgia Institute of Technology, Atlanta, GA 30332, USA;  
shivamsharma13@gatech.edu

<sup>2</sup> National Institute on Minority Health and Health Disparities, National Institutes of Health,  
Bethesda, MD 20892, USA; marino@nih.gov

\* Correspondence: king.jordan@biology.gatech.edu; Tel.: +1-404-385-2224

### Table of Contents

|                                                                                                                               |   |
|-------------------------------------------------------------------------------------------------------------------------------|---|
| Supplementary Machine Learning Methods .....                                                                                  | 2 |
| Supplementary Figure S1. Accuracy for prediction of <i>UKB</i> participants' ethnicity using<br>pharmacogenomic PCA data..... | 3 |
| Supplementary Figure S2. Scree plots for pharmacogenomic PCAs computed using <i>All of Us</i> and <i>UKB</i> ....             | 3 |
| Supplementary Table S1. Highly diverged pharmacogenomic variants in <i>UKB</i> .....                                          | 4 |
| Supplementary Figure S3. Examples of divergent pharmacogenomic variants in <i>UKB</i> .....                                   | 5 |

## Supplementary Machine Learning Methods

Pharmacogenomic variant data were used to predict biobank participant race and ethnicity using machine learning classifiers: K-nearest neighbors (kNN), random forest (RF), and support vector machine (SVM) classifier methods were implemented using the scikit-learn machine learning library v1.1.2 for Python [1].

**Model Training:** All of Us and UKB participant pharmacogenomic variant data were analyzed with principal component analysis (PCA) to yield to the top 25 PC-values. KNN, RF, and SVM classification models were trained with participants' self-identified race/ethnicity as class labels and the corresponding top 25 PC-values as feature vectors. Optimal hyperparameter values for all three classification models were obtained via randomized searches with cross-validation. There was no significant gain in accuracy when an exhaustive grid search was performed in the optimal hyperparameter ranges obtained from the randomized search. Model-specific hyperparameter values are defined below:

### KNN hyperparameter definitions

K – number of neighbors used for classification voting decisions.

### SVM hyperparameter definitions

Kernel – mathematical functions used to transform non-linear classification problems to linear forms for solution.

Regularization (C) – how much error can be tolerated in classification.

Gamma – used to define the distance of points to a plausible hyperplane used to find the correct hyperplane.

### RF hyperparameter definitions

Number of trees – number of trees used for the random forest classifier.

Maximum depth of tree – maximum number of edges from the root node to the leaf node in the longest path.

Minimum samples for leaf node – minimum number of samples required for leaf nodes.

Minimum samples to split node – minimum number of samples required to split an internal node.

**Model Testing:** The accuracy of pharmacogenomic variant-based race and ethnicity classification was tested using 5-fold cross-validation (CV) with the optimal set of hyperparameters for each model as described above. Accuracy was quantified as the mean  $\pm$  standard deviation for the percentage of correct race/ethnicity predictions in the five test data sets. Testing was repeated for feature vectors covering contiguous ranges of 2-25 PCs.

1. Pedregosa, F.; Varoquaux, G.; Gramfort, A.; Michel, V.; Thirion, B.; Grisel, O.; Blondel, M.; Prettenhofer, P.; Weiss, R.; Dubourg, V. Scikit-learn: Machine learning in Python. *the Journal of machine Learning research* **2011**, 12, 2825-2830.

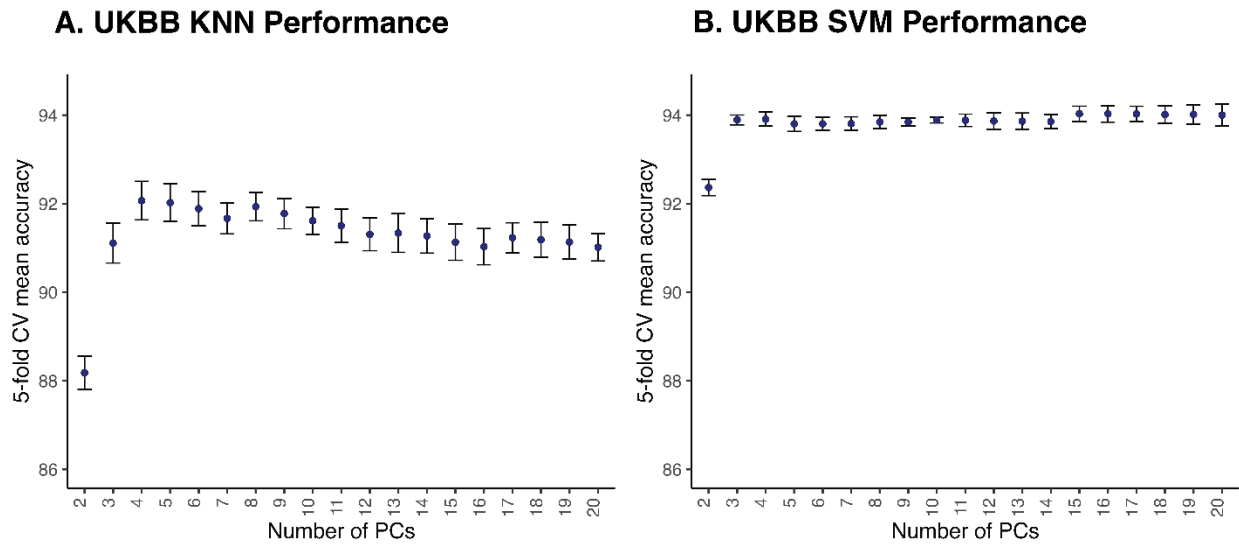

Supplementary Figure S1. **Accuracy for prediction of UKB participants' ethnicity using pharmacogenomic PCA data.** Results are shown for (A) k-nearest neighbors (KNN) and (B) support vector machines (SVM). Prediction accuracy values  $\pm$  standard deviations, based on 5-fold cross-fold (CV) validation, are shown (y-axis) according to the number of PCs used for prediction (x-axis).

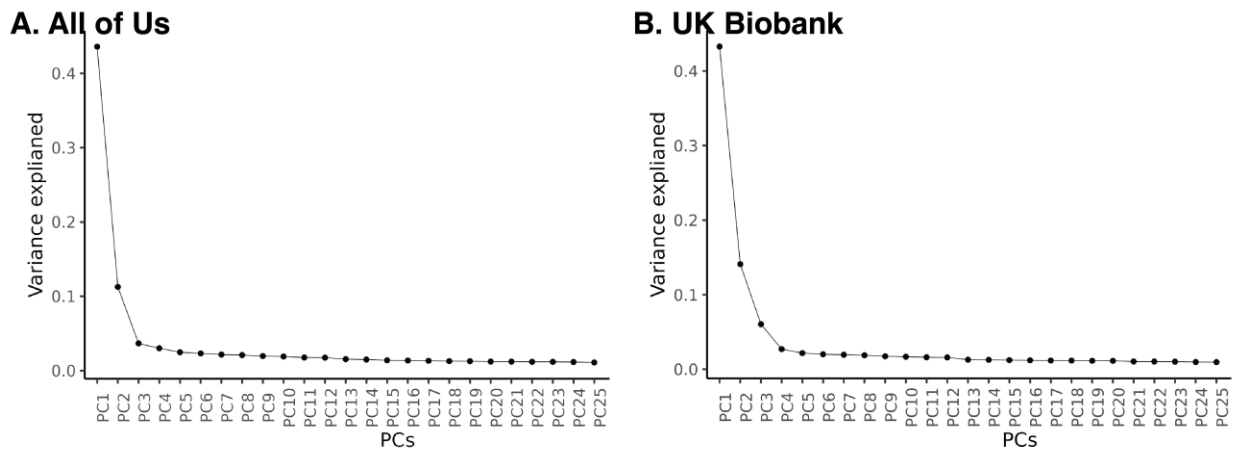

Supplementary Figure S2. **Scree plots for pharmacogenomic PCAs computed using (A) All of Us and (B) UKB.** The variance explained by each PC is shown.

Supplementary Table S1. **Highly diverged pharmacogenomic variants in UKB.**

| dbSNP ID <sup>a</sup> | Allele Weight (PC1, PC2) <sup>b</sup> | Level of evidence <sup>c</sup> | Gene                   | Drug                                                                                                                                                                                                                                                         |
|-----------------------|---------------------------------------|--------------------------------|------------------------|--------------------------------------------------------------------------------------------------------------------------------------------------------------------------------------------------------------------------------------------------------------|
| rs12979860            | 1.686, 1.5341                         | 1A                             | <i>IFNL3, IFNL4</i>    | peginterferon alfa-2a, peginterferon alfa-2b, ribavirin, telaprevir, boceprevir                                                                                                                                                                              |
| rs1801265             | 1.0063, 0.6096                        | 1A                             | <i>DPYD</i>            | fluorouracil, capecitabine                                                                                                                                                                                                                                   |
| rs2108622             | 1.2262, 0.3434                        | 1A                             | <i>CYP4F2</i>          | warfarin                                                                                                                                                                                                                                                     |
| rs9923231             | 1.3416, 1.2879                        | 1A                             | <i>VKORC1</i>          | warfarin, phenprocoumon, acenocoumarol                                                                                                                                                                                                                       |
| rs7294                | 0.0189, 0.3776                        | 1B                             | <i>VKORC1</i>          | warfarin                                                                                                                                                                                                                                                     |
| rs2359612             | 0.7182, 1.1143                        | 1B                             | <i>VKORC1</i>          | warfarin                                                                                                                                                                                                                                                     |
| rs9934438             | 1.344, 1.2859                         | 1B                             | <i>VKORC1</i>          | warfarin                                                                                                                                                                                                                                                     |
| rs8099917             | 0.8142, 0.7695                        | 1B                             | <i>IFNL3</i>           | interferons, peginterferon alfa-2a, peginterferon alfa-2b, ribavirin                                                                                                                                                                                         |
| rs4646437             | 2.7019, 0.4643                        | 2A                             | <i>CYP3A4</i>          | tacrolimus                                                                                                                                                                                                                                                   |
| rs1051266             | 0.9142, 0.0781                        | 2A                             | <i>SLC19A1</i>         | methotrexate                                                                                                                                                                                                                                                 |
| rs2884737             | 1.1035, 1.7788                        | 2A                             | <i>VKORC1</i>          | warfarin                                                                                                                                                                                                                                                     |
| rs1801133             | 0.9512, 0.9922                        | 2A                             | <i>MTHFR</i>           | methotrexate                                                                                                                                                                                                                                                 |
| rs20455               | 2.0525, 0.2579                        | 2B                             | <i>KIF6</i>            | pravastatin                                                                                                                                                                                                                                                  |
| rs4673993             | 1.3894, 0.962                         | 2B                             | <i>ATIC</i>            | pravastatin                                                                                                                                                                                                                                                  |
| rs25487               | 1.1484, 0.1001                        | 2B                             | <i>XRCC1</i>           | Platinum compounds                                                                                                                                                                                                                                           |
| rs3812718             | 1.0189, 0.412                         | 2B                             | <i>SCN1A</i>           | carbamazepine                                                                                                                                                                                                                                                |
| rs2740574             | 3.8036, 0.9328                        | 3                              | <i>CYP3A, CYP3A4</i>   | sirolimus, cyclosporine, tacrolimus, atorvastatin, simvastatin, fentanyl, buprenorphine, lumefantrine, bleomycin, cisplatin, etoposide, atazanavir, efavirenz, cyclophosphamide, cyclosporine, carbamazepine, indinavir, docetaxel, buprenorphine, tamoxifen |
| rs11559290            | 3.3242, 1.1753                        | 3                              | <i>ETFDH</i>           | methylphenidate                                                                                                                                                                                                                                              |
| rs6922548             | 3.4158, 0.8973                        | 3                              | <i>PPARD</i>           | docetaxel, thalidomide                                                                                                                                                                                                                                       |
| rs4646450             | 3.1635, 0.4359                        | 3                              | <i>CYP3A5, ZSCAN25</i> | tacrolimus                                                                                                                                                                                                                                                   |

<sup>a</sup> Variant IDs from the NCBI dbSNP database <https://www.ncbi.nlm.nih.gov/snp/>

<sup>b</sup> Allele weights are SNP dosage coefficients for each PC and measure the magnitude of variant (SNP) effects on PC values, i.e. the level of genetic divergence for each variant (see Methods).

<sup>d</sup> Level of evidence in support of the reported variant-drug association taken from the PharmGKB database.

## UK Biobank

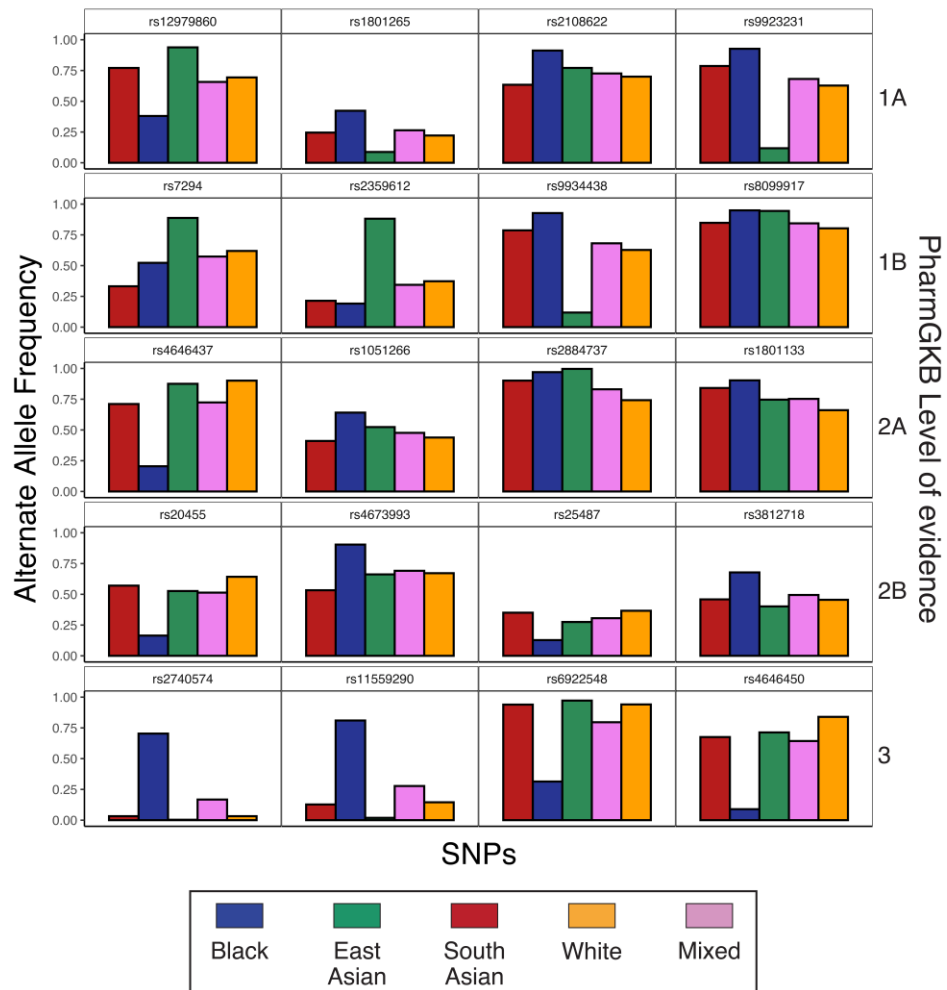

Supplementary Figure S3. **Examples of divergent pharmacogenomic variants in UKB.** Variant alternate allele frequencies are shown for each ethnic group. Examples are shown for the top five PharmGKB levels of evidence.
